# Supplementary material for: Boron Reduced Copper Excess-Induced Oxidative Damage in Citrus sinensis by Modulating Reactive Oxygen Species and Methylglyoxal Formation and Their Detoxification Systems
Source: MDPI journal article supplement (doi:10.3390/antiox13030268), 2024-02-22
Supplement: s1 [file s1]

## Supplementary Data (Tables S1 and Figures S1-S2)

**Table S1.** All parameters for two-way ANOVA for in leaves and roots

| Parameters | Tissue | Cu    |        | B    |        | Cu × B |        |
|------------|--------|-------|--------|------|--------|--------|--------|
|            |        | F     | p      | F    | p      | F      | p      |
| HPR        | Leaves | 21.3  | 0.0002 | 6.3  | 0.0084 | 3.9    | 0.0393 |
|            | Roots  | 46.5  | 0.0001 | 8.6  | 0.0023 | 8.0    | 0.0033 |
| SAPR       | Leaves | 24.3  | 0.0001 | 3.8  | 0.0423 | 7.3    | 0.0046 |
|            | Roots  | 19.8  | 0.0003 | 4.3  | 0.0292 | 3.5    | 0.0527 |
| MDA        | Leaves | 377.6 | 0.0001 | 46.2 | 0.0001 | 54.9   | 0.0001 |
|            | Roots  | 415.9 | 0.0001 | 63.3 | 0.0001 | 62.2   | 0.0001 |
| MG         | Leaves | 19.0  | 0.0004 | 7.7  | 0.0038 | 7.4    | 0.0046 |
|            | Roots  | 3.7   | 0.0721 | 2.2  | 0.1376 | 1.1    | 0.3421 |
| CAT        | Leaves | 113.6 | 0.0001 | 0.9  | 0.4327 | 3.9    | 0.0393 |
|            | Roots  | 45.5  | 0.0001 | 10.7 | 0.0009 | 9.7    | 0.0014 |
| APX        | Leaves | 18.9  | 0.0004 | 3.1  | 0.0702 | 2.7    | 0.0974 |
|            | Roots  | 3.6   | 0.0725 | 5.2  | 0.0165 | 3.3    | 0.0615 |
| DHAR       | Leaves | 52.7  | 0.0001 | 1.2  | 0.3253 | 3.6    | 0.0480 |
|            | Roots  | 30.1  | 0.0001 | 16.4 | 0.0001 | 11.6   | 0.0006 |
| MDHAR      | Leaves | 8.9   | 0.0080 | 2.5  | 0.1108 | 1.6    | 0.2298 |
|            | Roots  | 3.1   | 0.0932 | 5.0  | 0.0188 | 3.4    | 0.0575 |
| GR         | Leaves | 3.8   | 0.0675 | 1.7  | 0.2036 | 1.8    | 0.1924 |
|            | Roots  | 7.9   | 0.0114 | 4.5  | 0.0262 | 6.8    | 0.0064 |
| GuPX       | Leaves | 11.6  | 0.0032 | 4.6  | 0.0241 | 5.741  | 0.0118 |
|            | Roots  | 9.0   | 0.0076 | 0.4  | 0.6919 | 1.1    | 0.3629 |
| SOD        | Leaves | 37.2  | 0.0001 | 1.0  | 0.3738 | 1.3    | 0.3021 |
|            | Roots  | 49.0  | 0.0001 | 4.0  | 0.0370 | 3.2    | 0.0651 |
| ATPS       | Leaves | 5.0   | 0.0378 | 1.6  | 0.2257 | 2.0    | 0.1607 |
|            | Roots  | 0.2   | 0.6564 | 7.1  | 0.0054 | 6.5    | 0.0076 |
| APR        | Leaves | 12.1  | 0.0026 | 1.2  | 0.3270 | 1.0    | 0.3924 |
|            | Roots  | 3.8   | 0.0658 | 2.4  | 0.1155 | 2.7    | 0.0926 |
| SiR        | Leaves | 16.5  | 0.0007 | 0.9  | 0.4107 | 0.8    | 0.4660 |
|            | Roots  | 8.8   | 0.0082 | 2.8  | 0.0899 | 3.0    | 0.0739 |
| CS         | Leaves | 91.5  | 0.0001 | 3.6  | 0.0493 | 4.7    | 0.0235 |
|            | Roots  | 95.7  | 0.0001 | 5.5  | 0.0137 | 7.8    | 0.0036 |
| γGCS       | Leaves | 35.4  | 0.0001 | 1.8  | 0.1965 | 2.4    | 0.1160 |
|            | Roots  | 13.7  | 0.0016 | 3.2  | 0.0668 | 2.2    | 0.1437 |
| γGT        | Leaves | 24.3  | 0.0001 | 7.6  | 0.0041 | 5.8    | 0.0112 |
|            | Roots  | 10.9  | 0.0040 | 2.0  | 0.1586 | 2.2    | 0.1356 |
| GST        | Leaves | 37.4  | 0.0001 | 7.3  | 0.0048 | 16.0   | 0.0001 |
|            | Roots  | 8.9   | 0.0079 | 1.1  | 0.3647 | 2.6    | 0.0988 |
| Gly I      | Leaves | 3.1   | 0.0976 | 1.1  | 0.3583 | 5.9    | 0.0107 |
|            | Roots  | 1.7   | 0.2031 | 3.4  | 0.0546 | 3.7    | 0.0455 |
| Gly II     | Leaves | 5.1   | 0.0361 | 1.4  | 0.2647 | 0.6    | 0.5494 |
|            | Roots  | 18.4  | 0.0004 | 2.1  | 0.1489 | 3.1    | 0.0673 |
| TA         | Leaves | 13.6  | 0.0017 | 8.9  | 0.0021 | 12.2   | 0.0005 |
|            | Roots  | 95.4  | 0.0001 | 4.7  | 0.0226 | 4.3    | 0.0292 |
| ASC        | Leaves | 8.7   | 0.0085 | 6.8  | 0.0064 | 9.8    | 0.0013 |

|        |        |      |        |     |        |      |        |
|--------|--------|------|--------|-----|--------|------|--------|
|        | Roots  | 62.1 | 0.0001 | 2.3 | 0.1328 | 2.1  | 0.1520 |
| DHA    | Leaves | 8.4  | 0.0097 | 2.8 | 0.0849 | 3.2  | 0.0631 |
|        | Roots  | 17.3 | 0.0006 | 2.3 | 0.1241 | 2.0  | 0.1688 |
| ASC/TA | Leaves | 2.0  | 0.1761 | 0.1 | 0.8768 | 0.4  | 0.6615 |
|        | Roots  | 1.1  | 0.3016 | 0.5 | 0.6412 | 0.4  | 0.6623 |
| TG     | Leaves | 3.5  | 0.0793 | 1.2 | 0.3305 | 1.0  | 0.3709 |
|        | Roots  | 2.8  | 0.1097 | 1.5 | 0.2467 | 1.2  | 0.3313 |
| GSH    | Leaves | 3.4  | 0.0824 | 0.9 | 0.4111 | 0.9  | 0.4370 |
|        | Roots  | 3.0  | 0.1027 | 1.6 | 0.2290 | 1.3  | 0.3016 |
| GSSG   | Leaves | 0.2  | 0.8966 | 0.1 | 0.8840 | 0.2  | 0.7828 |
|        | Roots  | 0.0  | 0.9765 | 0.0 | 0.9977 | 0.0  | 0.9913 |
| GSH/TG | Leaves | 2.6  | 0.1226 | 0.3 | 0.7126 | 0.2  | 0.7876 |
|        | Roots  | 2.6  | 0.1224 | 0.6 | 0.5479 | 0.6  | 0.5816 |
| MTs    | Leaves | 13.2 | 0.0019 | 3.7 | 0.0446 | 3.4  | 0.0565 |
|        | Roots  | 52.6 | 0.0001 | 9.6 | 0.0015 | 10.6 | 0.0009 |
| PCs    | Leaves | 18.2 | 0.0005 | 7.0 | 0.0057 | 6.5  | 0.0076 |
|        | Roots  | 20.0 | 0.0003 | 3.5 | 0.0526 | 2.7  | 0.0960 |
| TNP-SH | Leaves | 18.0 | 0.0005 | 6.9 | 0.0061 | 6.3  | 0.0084 |
|        | Roots  | 19.7 | 0.0003 | 3.5 | 0.0532 | 2.7  | 0.0949 |

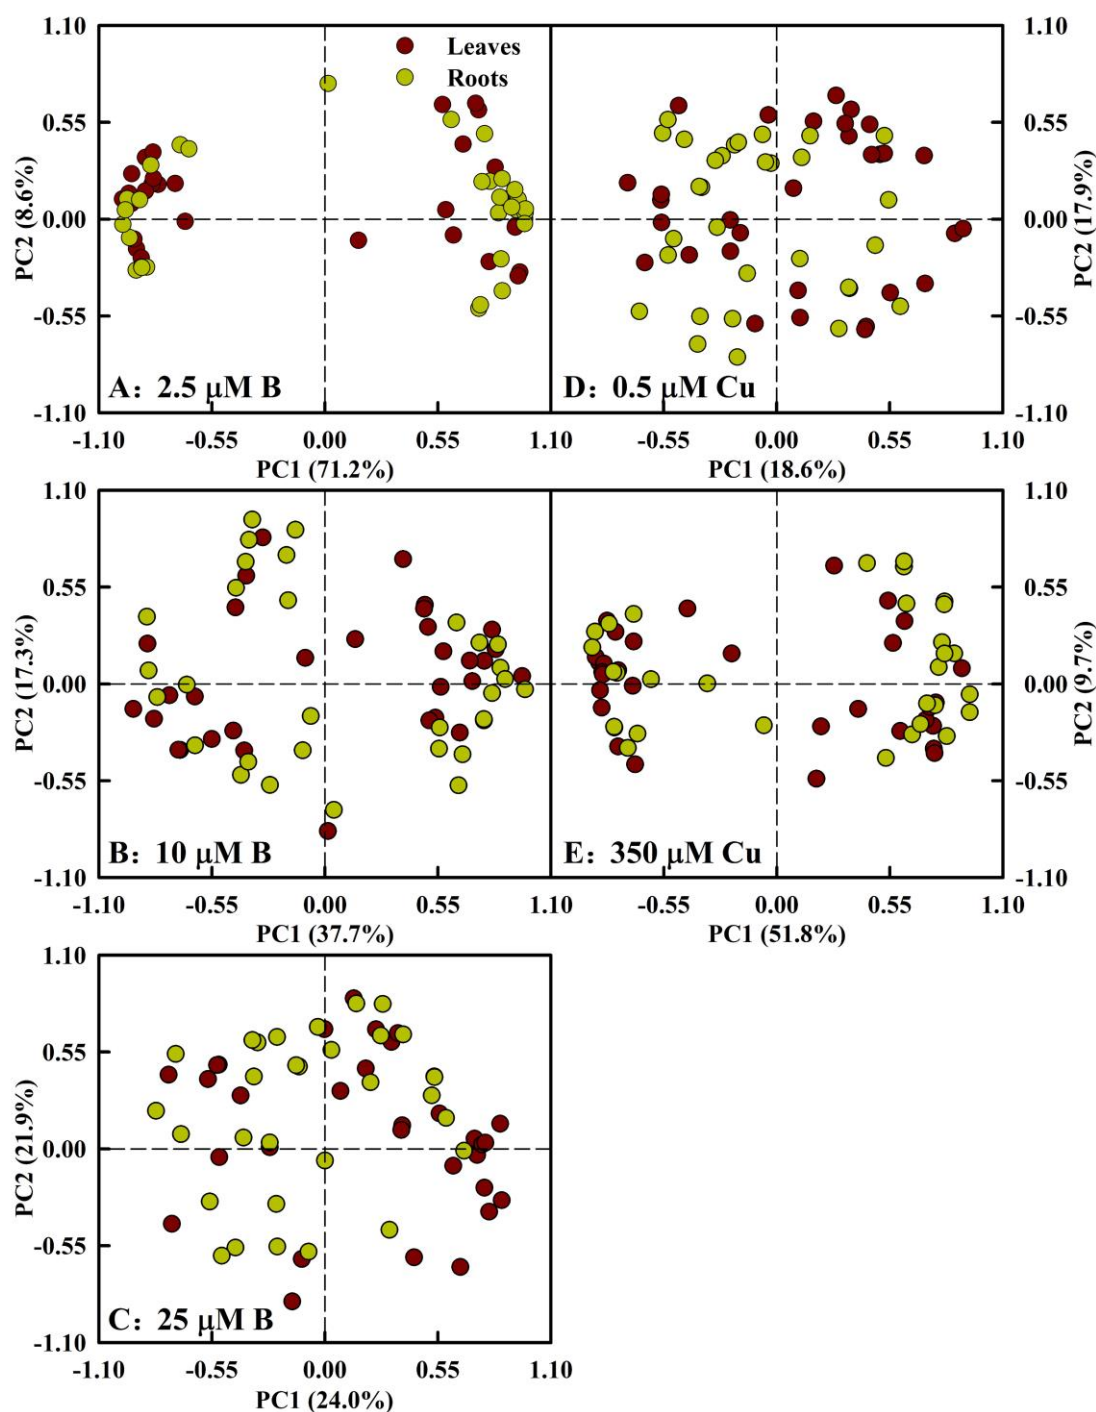

**Fig. S1.** Principle component scatter plot for 62 indexes (31 leaf + 31 root indexes) in leaves and roots of 2.5 (A), 10 (B), and 25 (C)  $\mu\text{M}$  B-treated *Citrus sinensis* seedlings at various Cu (0.5 and 350  $\mu\text{M}$ ) levels, and in leaves and roots of 0.5 (D) and 350 (E)  $\mu\text{M}$  Cu-treated *C. sinensis* seedlings at various B (2.5, 10, and 25  $\mu\text{M}$ ) levels.

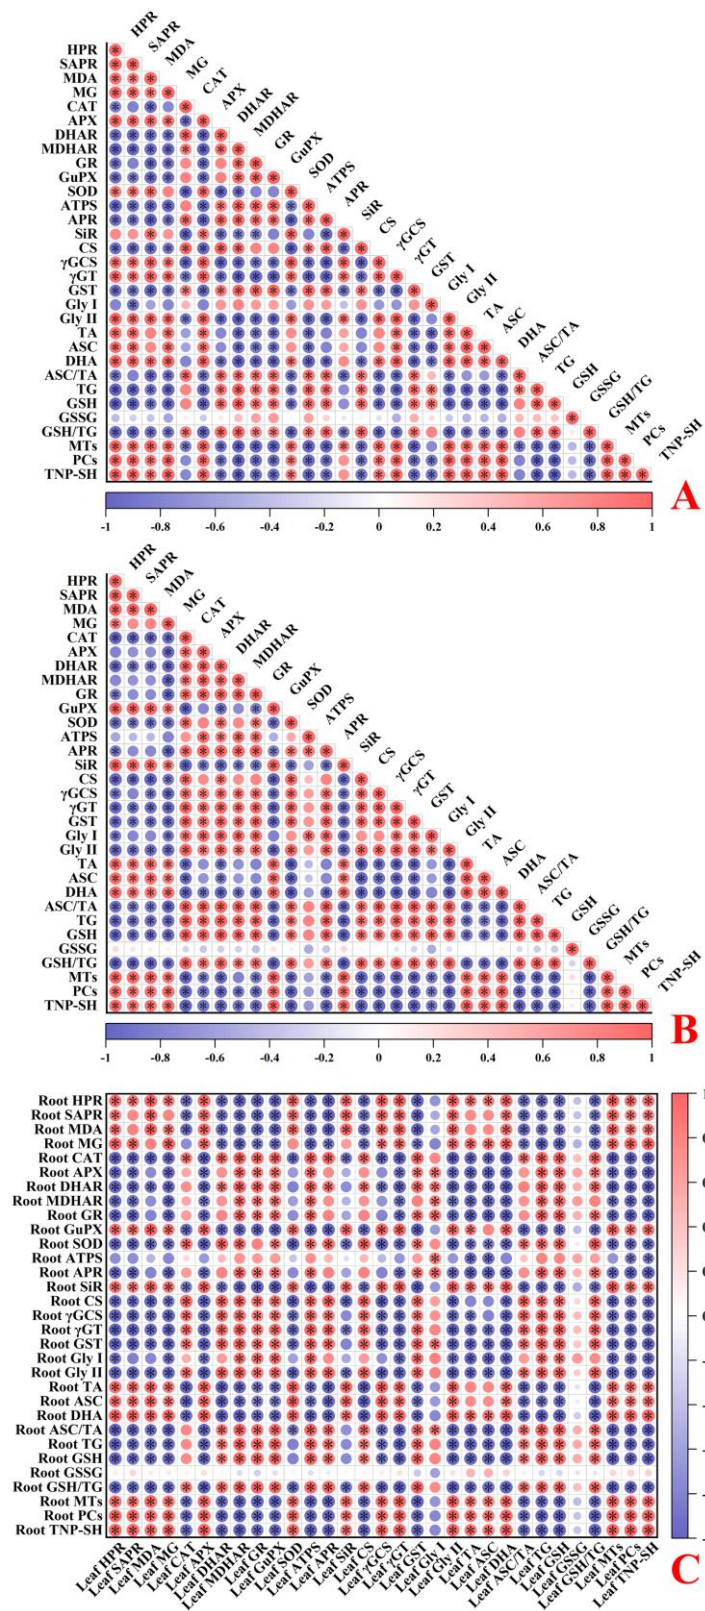

**Fig. S2.** Pearson correlation coefficient matrices for the mean values of 31 physiological parameters in leaves (A), roots (B), and between leaves and roots (C) of *C. sinensis* seedlings.
